# Supplementary material for: Functionalized Oxoindolin Hydrazine Carbothioamide Derivatives as Highly Potent Inhibitors of Nucleoside Triphosphate Diphosphohydrolases
Source: Front Pharmacol. 2020 Nov 30;11:585876. doi: 10.3389/fphar.2020.585876 (PMC7734281; doi:10.3389/fphar.2020.585876)
Supplement: Supplementary file 1 [file datasheet1.docx]

Supplementary Material

# Representative 1H and 13C NMR Spectra:

NMR (including 1H and 13C NMR) spectra for representative compounds are given below

**8c**

**Supplementary Figure 1.** 1H spectra of compound **8c**

**Supplementary Figure 2.** 13C spectra of compound **8c**

**8d**

**Supplementary Figure 3.** 1H spectra of compound **8d**

**Supplementary Figure 4.** 13C spectra of compound **8d**

**8f**

**Supplementary Figure 5.** 1H spectra of compound **8f**


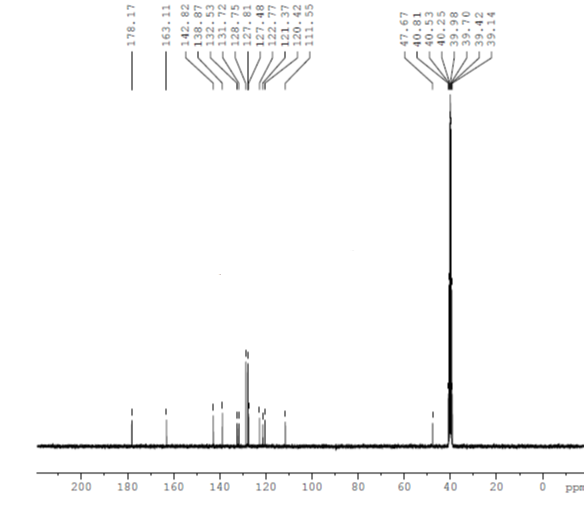


**Supplementary Figure 6.** 13C spectra of compound **8f**

**8i**

**Supplementary Figure 7.** 1H spectra of compound **8i**

**Supplementary Figure 8.** 13C spectra of compound **8i**

**8m**

**Supplementary Figure 9.** 1H spectra of compound **8m**


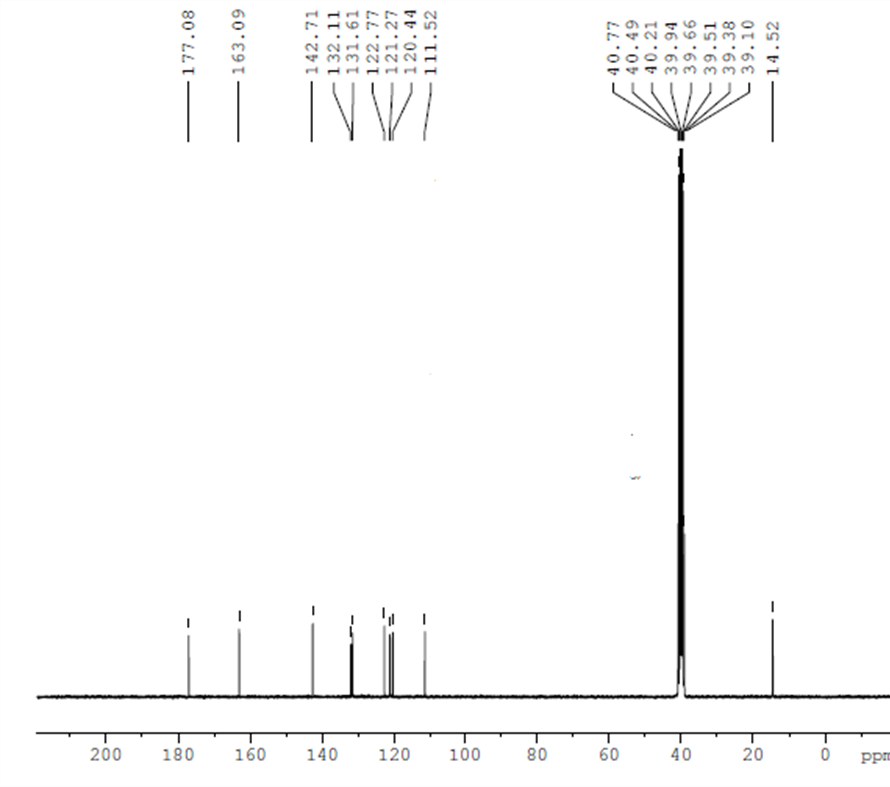


**Supplementary Figure 10.** 13C spectra of compound **8m**

HSQC Data of Compound **8i**


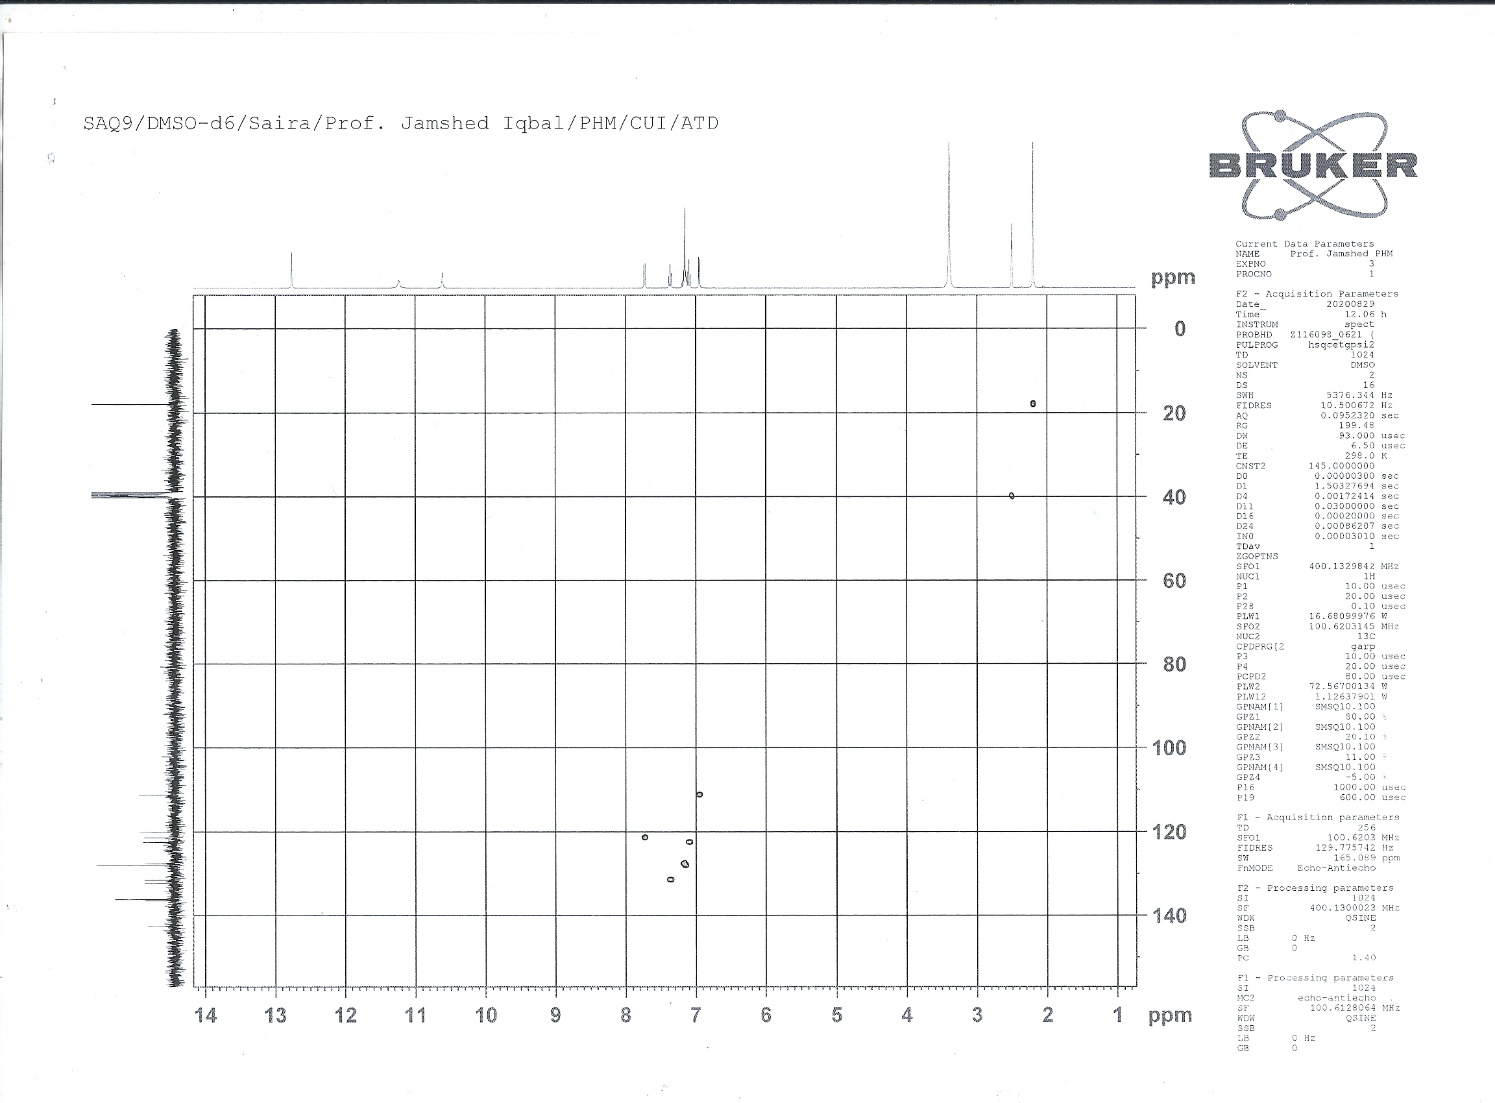


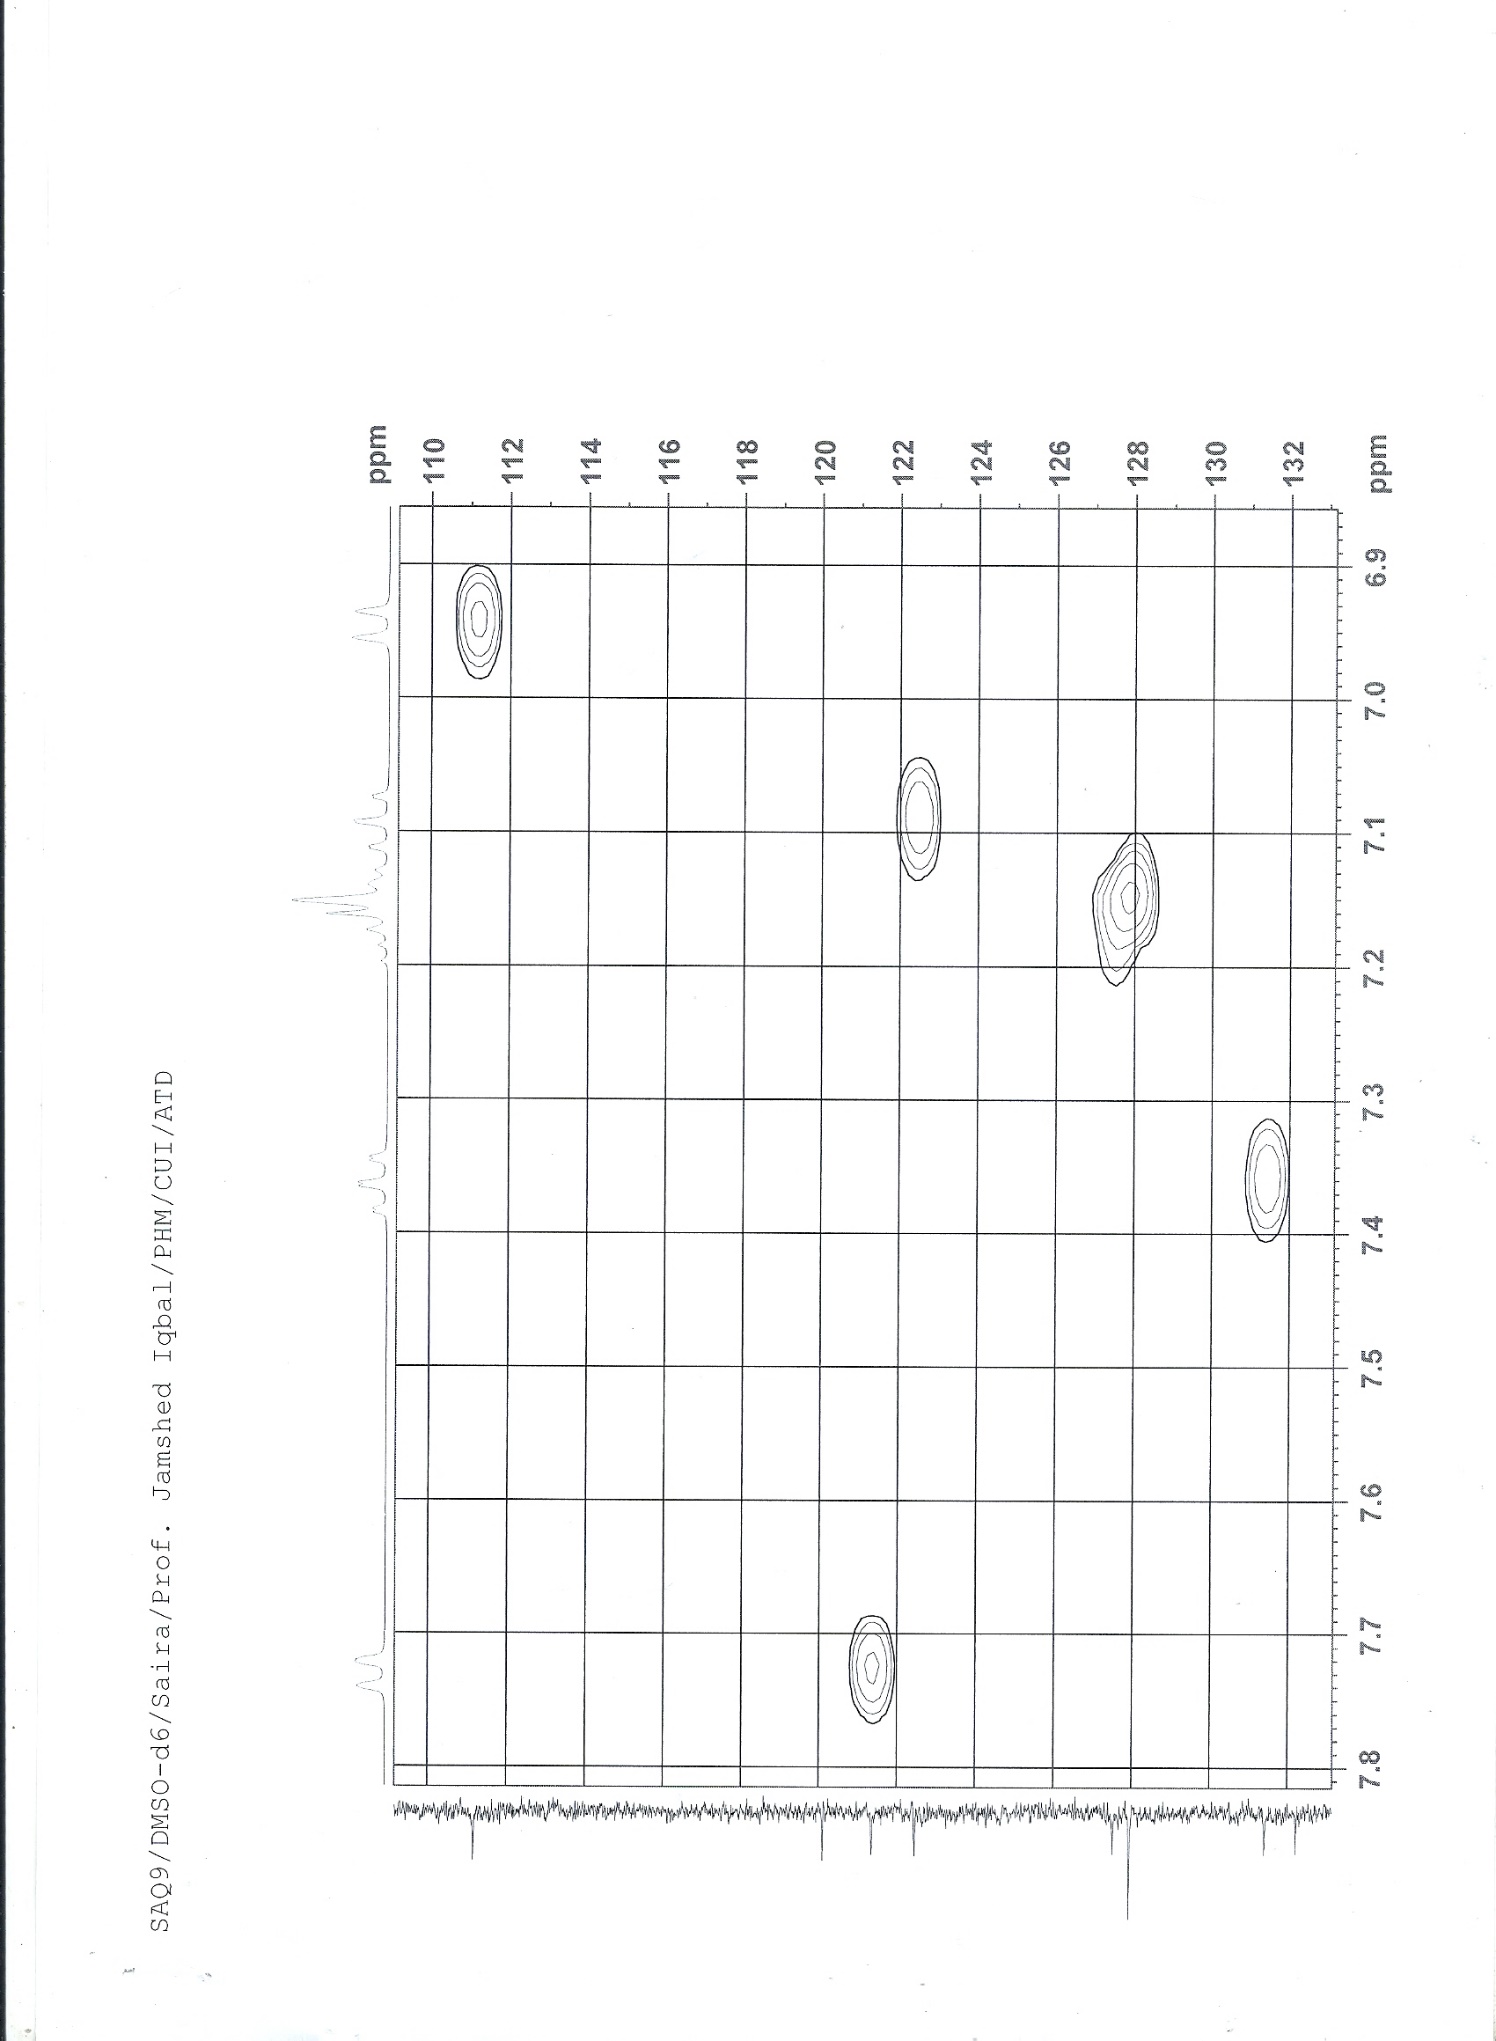


HMBC Data of Compound **8i**
